# Supplementary figures and images for: A biopharmaceutical plant on a chip: continuous micro-devices for the production of monoclonal antibodies
Source: Royal Society of Chemistry journal article supplement (doi:10.1039/c3lc50104c), 2013-01-01

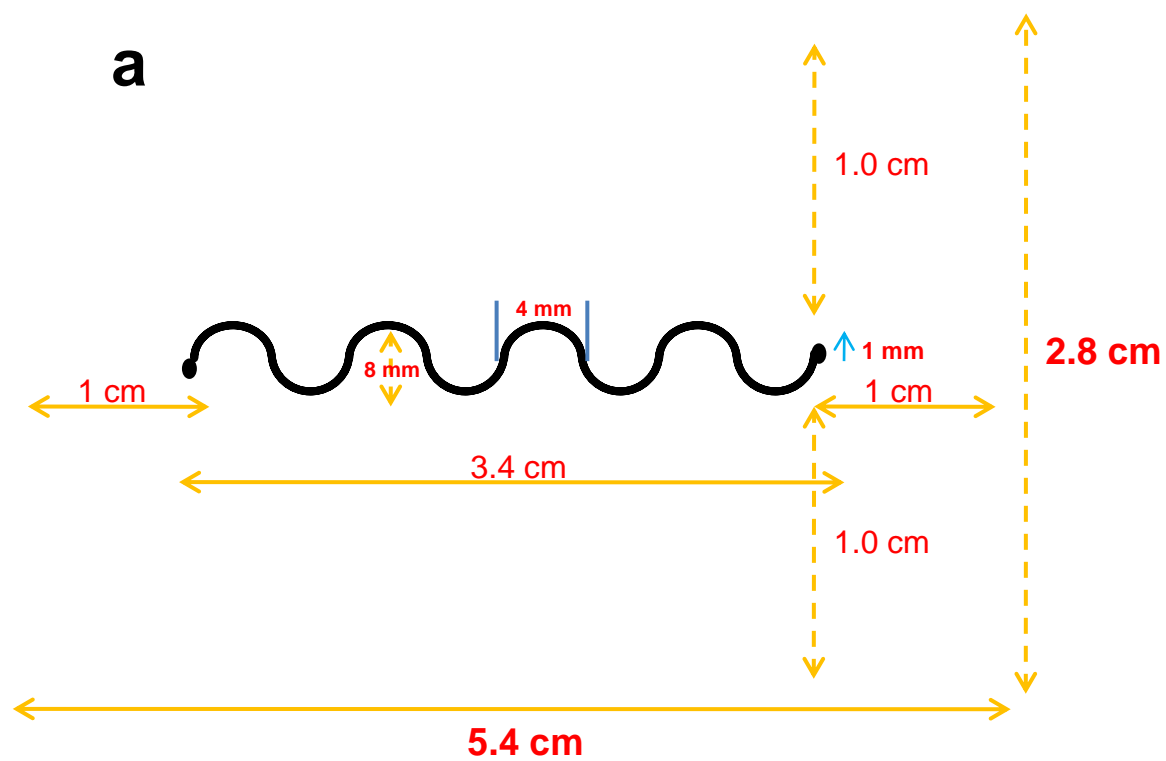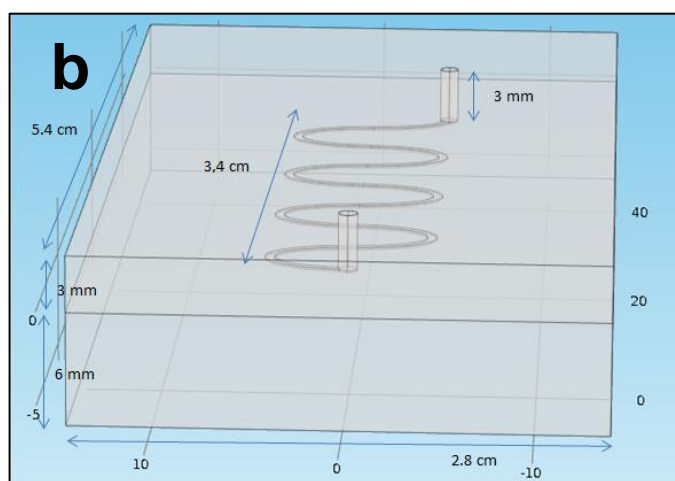

**Figure S1.**  
García-Garza et al., 2012

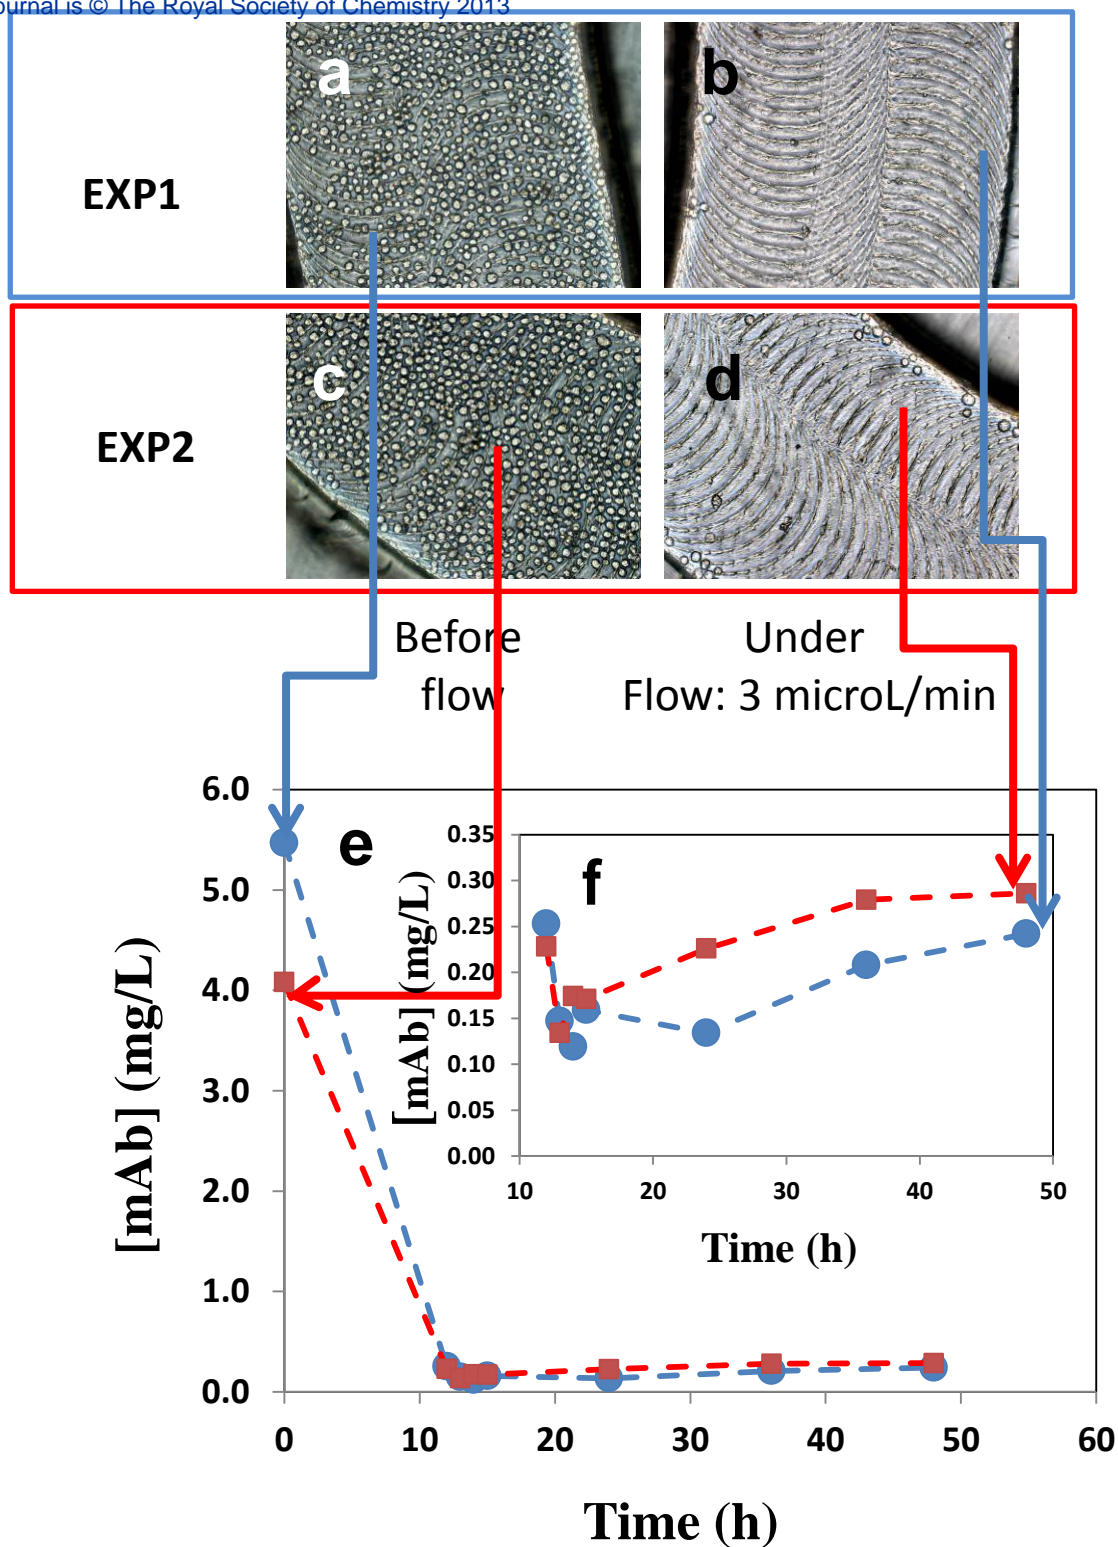

**Figure S2.**

García-Garza et al., 2012

Supplement: c3lc50104c_2.pdf [file c3lc50104c_2.pdf]
